# Structure of EPCR in a non-canonical conformation

Elena Erausquin<sup>1,2,3†</sup>, Adela Rodríguez-Fernández<sup>1,2,3†</sup>, Jacinto López-Sagaseta<sup>1,2,3,4\*</sup>

<sup>1</sup> Unit of Protein Crystallography and Structural Immunology, Navarrabiomed, 31008, Navarra, Spain.

<sup>2</sup> Public University of Navarra (UPNA), Pamplona, 31008, Navarra, Spain.

<sup>3</sup> Navarra Hospital Complex, Pamplona, 31008, Navarra, Spain.

<sup>4</sup> Ramón y Cajal Investigator, Ministry of Science and Innovation, Government of Spain.

<sup>†</sup> Equal contribution.

\* To whom correspondence should be addressed: [jacinto.lopez.sagaseta@navarra.es](mailto:jacinto.lopez.sagaseta@navarra.es)

## Abstract

Structural motion and conformational flexibility are often linked to biological functions of proteins. Whether the endothelial protein C receptor (EPCR), like other molecules, is vulnerable to folding transitions or might adopt alternative conformations remains unknown. The current understanding points to a rigid molecular structure suitable for binding of its ligands, like the anticoagulant protein C, or the CIDR $\alpha$ 1 domains of *Plasmodium falciparum*. In this study, we have identified a novel conformation of EPCR, captured by X-ray diffraction analyses, whereby Tyr154 shows a dramatically altered structural arrangement, likely incompatible with protein C binding. Biolayer interferometry analysis confirms previous results supporting a critical role for this position in protein C binding. Importantly, the conformational change has no apparent effect in the bound lipid. We conclude these findings reveal a site of conformational vulnerability in EPCR and inform a highly malleable region that could modulate EPCR functions.

## Introduction

EPCR is an essential regulatory receptor that quickens the generation of the anticoagulant activated protein C (APC) on the surface of endothelial cells, which in turn prevents unhealthful levels of thrombin in blood. While EPCR mutations are linked to prothrombotic clinical outcomes<sup>1</sup> and fetal death<sup>2</sup> in humans, EPCR<sup>-/-</sup> mice do not survive beyond the embryonic stage due to thrombotic associated lethality<sup>3</sup>, which mirrors the critical relevance of this receptor for proper development of life in mammals. Structurally, EPCR is a non-conventional MHC class I-like protein with a well-defined molecular architecture<sup>4</sup>. Like the CD1 family of receptors, EPCR presents bound lipids in a central and hydrophobic cavity.

A high-resolution crystal structure of the protein C Gla domain bound to EPCR<sup>4</sup>, and alanine mutagenesis studies<sup>5</sup>, identified the amino acids in EPCR proximal to the Gla domain that contribute and are essential for protein C/APC binding. Among these, Tyr154 plays a critical role as it establishes a nourished network of interactions with the Gla domain that likely sustains protein C/APC binding.

Through X-ray diffraction studies, we have identified a novel, non-canonical conformational state of EPCR with a strikingly unconventional fold in the Tyr154-Thr157

45 region. Particularly, a dramatic altered positioning of Tyr154 side chain is observed. This  
46 novel conformation in the  $\alpha_2$  helix reveals a structurally vulnerable region in EPCR that  
47 could contribute to its varied biological functions.

## 48 **Results and discussion**

49 Structural studies performed in our laboratory enabled crystallization of EPCR in an  
50 unusual conformation (Figures 1A-B and 2A). Structure solution readily showed  $F_o - F_c$   
51 difference signal indicating an evident conformational change in the  $\alpha_2$  helix with  
52 particular impact in the orientation of Tyr154 side chain. Previous studies by Liaw and  
53 colleagues have demonstrated that Tyr154 side chain is essential for proper binding of  
54 protein C/APC to EPCR, as Tyr154 replacement with alanine results in an EPCR form  
55 unable to bind PC/APC<sup>5</sup>. This non-canonical rotamer of Tyr154 is the result of an  
56 alternative structural arrangement of a short loop that switches the direction of the  $\alpha_{2-1}$   
57 helix (Figures 1A-C). The hinge-like motif can be seen as a structural piece that breaks  
58 the  $\alpha_2$  helix into two independent helical rigid bodies,  $\alpha_{2-1}$  and  $\alpha_{2-2}$ . This is a common  
59 feature also observed in MHC class I and II antigen-presenting molecules<sup>6</sup>.

60 Analysis of the interaction between EPCR and the protein C Gla domain shows how  
61 Tyr154 establishes numerous Van der Waals contacts with protein C Gla backbone and  
62 Asn2 and Phe4 side chains (figure 2A). A hydrogen-bond with Gla7 further contributes  
63 to the overall network of interactions mediated by Tyr154. In this novel structure, Tyr154  
64 shows a profound structural transition and alters the location of its side chain in a manner  
65 such that is completely away from the protein C binding site. The protein backbone at  
66 this region also presents a deep rearrangement, starting with a rotation of the Ala153  
67 carbonyl by 90°, and followed by severe conformational shifts that affect not only Tyr154  
68 but Asn155, Arg156 and Thr157 peptide bonds angles and side chains (Figure 1B).  
69 Arg156 is particularly flexible. While unliganded EPCR structures show a highly mobile  
70 Arg156 side chain, as inferred from the lack of electron density signals in previously  
71 reported structures, its position in the protein C Gla-bound structure is restricted by the  
72 interaction. This plasticity in the Arg156 side chain suggests that EPCR exists as a  
73 heterogeneous population whereby only those EPCR molecules with Arg156 in a  
74 favorable conformation enable protein C/APC binding. Or alternatively, this flexibility  
75 favors Arg156 motion and protein C docking. This is consistent in our structure, where  
76 we do not observe electron density signal for Arg156 side chain. From position 156, the  
77 receptor restores its canonical conformation at Arg158.

78 In our crystal structure, each EPCR monomer have crystallographic symmetry mates with  
79 N-glycosylation molecules in the vicinity of Tyr154 (Figure 2C). It could be argued that  
80 this crystal packing and crystallographic contacts might have forced this novel  
81 conformation of the  $\alpha_{2-1}$ - $\alpha_{2-2}$  loop. However, our crystal recapitulates the space group and  
82 crystal packing of the previously EPCR structure (PDB 1L8J) solved by Oganessyan *et*  
83 *al*<sup>4</sup>. That is, the sugar molecules near to each EPCR monomer are also present in the  
84 previously determined structure, and therefore rules out a potential crystallization-  
85 induced conformation. Still, even if this alternative conformation was triggered by a close  
86 interacting molecule, it would reveal a site of vulnerability in a region of EPCR that is  
87 key for its anticoagulant properties.

88 To confirm the relevance of Tyr154 in protein C binding, we replaced it with alanine and  
89 monitored any potential binding to EPCR. As expected, and confirming previous findings  
90 by other groups<sup>5,7</sup>, replacement of EPCR Tyr154 with alanine has a profound impact in  
91 APC binding (Figure 2B). Consequently, our results support that Tyr154 is imperative  
92 for EPCR-mediated anticoagulation.

93  
94

**Table 1. Diffraction data collection and refinement statistics.**

|                                  |                             |
|----------------------------------|-----------------------------|
| <b>Resolution range</b>          | 35.2 - 1.8                  |
| <b>Space group</b>               | P3 <sub>1</sub> 21          |
| <b>Unit cell</b>                 | 70.47 70.47 96.64 90 90 120 |
| <b>Total reflections</b>         | 159141 (15874)              |
| <b>Unique reflections</b>        | 26276 (2580)                |
| <b>Multiplicity</b>              | 6.1 (6.2)                   |
| <b>Completeness (%)</b>          | 99.89 (99.96)               |
| <b>Mean I/sigma(I)</b>           | 23.51 (1.69)                |
| <b>Wilson B-factor</b>           | 42.16                       |
| <b>R-merge</b>                   | 0.0328 (0.936)              |
| <b>R-meas</b>                    | 0.0360 (1.024)              |
| <b>R-pim</b>                     | 0.0146 (0.4107)             |
| <b>CC1/2</b>                     | 0.999 (0.665)               |
| <b>R-work</b>                    | 0.186 (0.322)               |
| <b>R-free</b>                    | 0.199 (0.402)               |
| <b>Protein residues</b>          | 174                         |
| <b>RMS(bonds)</b>                | 0.012                       |
| <b>RMS(angles)</b>               | 1.12                        |
| <b>Ramachandran favored (%)</b>  | 96.49                       |
| <b>Ramachandran allowed (%)</b>  | 3.51                        |
| <b>Ramachandran outliers (%)</b> | 0.00                        |
| <b>Rotamer outliers (%)</b>      | 0.00                        |
| <b>Clashscore</b>                | 5.73                        |
| <b>Average B-factor</b>          | 59.44                       |

Values in the highest-resolution shell are in parentheses.

95  
96

97 The lipid ligand bound in the central cavity does not show any apparent alteration. As  
98 in the previous structure with the canonical EPCR structure, the electron density maps  
99 indicate the presence of a phospholipid molecule bound in the groove in a way similar to  
100 that already found by Oganessian *et al*<sup>4</sup>.

101 Conformational heterogeneity and structural motion are inherent features often found in  
102 proteins. For instance, G protein-coupled receptors (GPCRs) possess structural motility  
103 that results essential for their biological properties<sup>8,9</sup>. Numerous crystallization studies  
104 have led to a deep understanding of GPCR molecular plasticity, which results in a wide  
105 spectrum of structural states. Another example of conformational plasticity is NFAT or  
106 the nuclear factor of activated T cells. X-ray structural studies of this transcription factor  
107 provide evidences for the coexistence of a heterogeneous population of fairly diverse  
108 conformations<sup>10</sup>.

109 In this study we have identified a novel conformation of EPCR that features a deep  
110 structural motion in Tyr154 and surrounding residues. This molecular transition  
111 associates with an EPCR state that lacks ability to bind protein C/APC. Our results point  
112 to a multivariate folding state of EPCR in physiological conditions. The structural  
113 plasticity of the hinge region represents a site of vulnerability that could be modulated by  
114 alternative binders. The question remains whether this novel folding arrangement  
115 represents a structural binding motif for other EPCR ligands, and which could determine  
116 relevant yet unknown roles of EPCR. In this line, recent works suggest EPCR-dependent  
117 T cell<sup>11-13</sup> and antibody<sup>14</sup> recruitment, which indicates that EPCR can interact with a  
118 broad variety of protein molecules.

119 In conclusion, this work reveals EPCR is not a receptor with a unique and rigid  
120 conformation “ready-to-bind” its ligands. EPCR presents a structurally vulnerable region  
121 in the  $\alpha 2$  helix whose conformation may dictate EPCR properties in blood coagulation  
122 and recognition by immune receptors.

## 123 **Materials and Methods**

### 124 *Recombinant production of EPCR*

125 The extracellular region of human EPCR was produced in sf9 insect cells. Human EPCR  
126 cDNA (Genscript) was PCR amplified and cloned in frame with a GP64 signal peptide  
127 in a pAcGP67A transfer vector, using BamHI and NotI restriction enzymes and  
128 Optizyme™ T4 DNA ligase (Thermo Fisher Scientific). For crystallization purposes, the  
129 EPCR construct was prepared with an N-terminal 6xHis tag followed by a 3C protease  
130 cleavage site. For binding studies, we replaced this tag with a C-terminal 12xHis tag in a  
131 new EPCR construct. The Y154A substitution was prepared using the EPCR<sub>12xHis</sub>  
132 template and complementary oligos containing the desired mutation. The first PCR  
133 products were used for a final overlapping PCR reaction that generated the final  
134 EPCR<sub>Y154A</sub> construct with the C-terminal 12xHis motif. Sf9 insect cells (Gibco™) were  
135 transduced with the recombinant purified plasmids, BestBac 2.0  $\Delta$  v-cath/chiA Linearized  
136 Baculovirus DNA and Expres2 TR Transfection Reagent (Expression Systems) to  
137 produce recombinant baculovirus. All sequences were validated by Sanger sequencing  
138 (Stabvida).

139

### 140 *EPCR expression and purification*

141 Sf9 insect cells were infected with EPCR amplified baculovirus, and the culture medium  
142 was collected after 72 hours of incubation at 28 °C in an orbital shaker. The culture  
143 supernatant was freed of cells by centrifugation and the clarified sample was concentrated

144 using a 10 KDa MWCO Vivaflow (Sartorius) concentration device and dialysed  
145 overnight in HBS pH 7.4 buffer before purification with a Nickel NTA Agarose  
146 prepacked column (ABT). Protein was eluted with 20 mM Hepes 7.4 supplemented with  
147 150 mM NaCl and 200 mM imidazole. Purified protein was digested overnight with in-  
148 house made 3C protease<sup>13</sup> after imidazole removal. The tag-free protein was again loaded  
149 into the NiNTA Agarose cartridge and the flow through recovered. All purification steps  
150 were performed in an AKTA Pure 25M station (Cytiva). Protein purity was assessed by  
151 SDS-PAGE, then concentrated to 11.7 mg/mL for crystallization purposes.

152

#### 153 *Crystallization and diffraction data collection*

154 EPCR (11.7 mg/mL) was first screened against different crystallization reagents  
155 (Hampton Research and Molecular Dimensions) by the sitting drop vapour diffusion  
156 method. Initial hits were optimised in 24-well plates. The largest crystals appeared in 0.1  
157 M sodium potassium tartrate, 20% PEG 3350 and recovered from the drop, soaked in the  
158 crystallization medium supplemented with 20% glycerol and cryo-cooled in liquid  
159 nitrogen prior to diffraction analyses.

160

#### 161 *Structure determination and refinement*

162 Diffraction data was collected at the Xaloc beamline, ALBA Synchrotron (Cerdanyola  
163 del Vallès). Data was indexed and integrated with XDS<sup>15</sup>, then scaled and merged with  
164 Aimless (CCP4 crystallographic suite)<sup>16</sup>. Previously deposited coordinates of EPCR  
165 (PDB accession number 1LQV) without ligands or water molecules were used as template  
166 to solve the structure using molecular replacement with Phaser<sup>17</sup>, which was then refined  
167 with phenix.refine<sup>18</sup>. Refinement strategies included XYZ, individual B-factors and  
168 optimization of X-ray/stereochemistry weight and X-ray/ADP weight. Initial steps were  
169 performed using rigid body refinement and Translation-Libration-Screw parameters were  
170 included in the final refinement processes. Conformational changes, ligands and water  
171 molecules were added guided by  $F_o-F_c$  difference maps. The final molecule was  
172 generated after several cycles of manual building in Coot and refinement.

173

#### 174 *C-terminal 12xHis EPCR expression and purification*

175 Sf9 insect cells were infected with EPCR<sub>WT</sub> or EPCR<sub>Y154A</sub> baculovirus for 72 hours before  
176 culture medium collection. Culture supernatants were clarified and the proteins purified  
177 in HisGraviTrap columns (Cytiva). Proteins were eluted using 20 mM Hepes pH 7.4, 150  
178 mM NaCl and 500 mM imidazole and buffer exchanged to 20 mM Tris pH 8.0 on a  
179 HiPrep 26/10 Desalting column (Cytiva) before further purification on HiTrap CaptoQ  
180 ImpRes IEX column (Cytiva). Pure protein was concentrated using 10 KDa Nanosep  
181 columns (Pall Corporation), aliquoted and frozen in liquid nitrogen for storage at -80°C.

182

#### 183 *Biolayer interferometry*

184 The impact of the Y154A substitution on EPCR was assessed by biolayer interferometry  
185 using the BLItz system (Sartorius). 12xHis-tagged EPCR<sub>WT</sub> or EPCR<sub>Y154A</sub> was  
186 immobilized on the surface of NiNTA pre-coated biosensors (Sartorius), at a  
187 concentration of 100 µg/mL, until stable levels were reached. The sensor was then pulsed

188 with increasing concentrations of purified human APC (ThermoFisher) in 20 mM Hepes  
189 pH 7.4, 150 mM NaCl, 3 mM CaCl<sub>2</sub> and 0.6 mM MgCl<sub>2</sub>. Interaction kinetics were  
190 calculated for each ligand and fitted to a 1:1 Langmuir binding model using the BLItz  
191 software (version 1.2.1.5).

## 192 **References**

- 193 1. Dennis, J. *et al.* The endothelial protein C receptor (PROCR) Ser219Gly variant  
194 and risk of common thrombotic disorders: a HuGE review and meta-analysis of  
195 evidence from observational studies. *Blood* **119**, 2392–2400 (2012).
- 196 2. Franchi, F. *et al.* Mutations in the thrombomodulin and endothelial protein C  
197 receptor genes in women with late fetal loss. *Br. J. Haematol.* **114**, 641–646  
198 (2001).
- 199 3. Gu, J.-M. *et al.* Disruption of the endothelial cell protein C receptor gene in mice  
200 causes placental thrombosis and early embryonic lethality. *J. Biol. Chem.* **277**,  
201 43335–43343 (2002).
- 202 4. Oganessian, V. *et al.* The crystal structure of the endothelial protein C receptor  
203 and a bound phospholipid. *J Biol Chem* **277**, 24851–24854 (2002).
- 204 5. Liaw, P. C., Mather, T., Oganessian, N., Ferrell, G. L. & Esmon, C. T.  
205 Identification of the protein C/activated protein C binding sites on the endothelial  
206 cell protein C receptor. Implications for a novel mode of ligand recognition by a  
207 major histocompatibility complex class 1-type receptor. *J. Biol. Chem.* **276**,  
208 8364–8370 (2001).
- 209 6. Zacharias, M. & Springer, S. Conformational flexibility of the MHC class I  
210 alpha1-alpha2 domain in peptide bound and free states: a molecular dynamics  
211 simulation study. *Biophys. J.* **87**, 2203–2214 (2004).
- 212 7. Sampath, S. *et al.* Plasmodium falciparum adhesion domains linked to severe  
213 malaria differ in blockade of endothelial protein C receptor. *Cell. Microbiol.* **17**,  
214 1868–1882 (2015).
- 215 8. Mary, S. *et al.* Ligands and signaling proteins govern the conformational  
216 landscape explored by a G protein-coupled receptor. *Proc. Natl. Acad. Sci. U. S.*  
217 *A.* **109**, 8304–8309 (2012).
- 218 9. Luttrell, L. M. & Kenakin, T. P. Refining efficacy: allostereism and bias in G  
219 protein-coupled receptor signaling. *Methods Mol. Biol.* **756**, 3–35 (2011).
- 220 10. Stroud, J. C. & Chen, L. Structure of NFAT bound to DNA as a monomer. *J.*  
221 *Mol. Biol.* **334**, 1009–1022 (2003).
- 222 11. Willcox, C. R. *et al.* Cytomegalovirus and tumor stress surveillance by binding of  
223 a human gammadelta T cell antigen receptor to endothelial protein C receptor.  
224 *Nat. Immunol.* **13**, 872–879 (2012).
- 225 12. Mantri, C. K. & St John, A. L. Immune synapses between mast cells and

- 226           gammadelta T cells limit viral infection. *J. Clin. Invest.* (2018).  
227           doi:10.1172/JCI122530
- 228    13.    Erausquin, E. *et al.* A novel  $\alpha/\beta$  T-cell subpopulation defined by recognition of  
229           EPCR. *bioRxiv* 2021.07.01.450412 (2021). doi:10.1101/2021.07.01.450412
- 230    14.    Müller-Calleja, N. *et al.* Lipid presentation by the protein C receptor links  
231           coagulation with autoimmunity. *Science* **371**, (2021).
- 232    15.    Kabsch, W. XDS. *Acta Crystallogr D Biol Crystallogr* **66**, 125–132 (2010).
- 233    16.    Evans, P. R. & Murshudov, G. N. How good are my data and what is the  
234           resolution? *Acta Crystallogr. D. Biol. Crystallogr.* **69**, 1204–1214 (2013).
- 235    17.    McCoy, A. J. *et al.* Phaser crystallographic software. *J. Appl. Crystallogr.* **40**,  
236           658–674 (2007).
- 237    18.    Adams, P. D. *et al.* PHENIX: a comprehensive Python-based system for  
238           macromolecular structure solution. *Acta Crystallogr D Biol Crystallogr* **66**, 213–  
239           221 (2010).

240

#### 241    **Acknowledgements**

242    This work was supported by Ramón y Cajal (RYC-2017-21683) and Generación de  
243    Conocimiento (PGC2018-094894-B-I00) grants to JLS from the Ministry of Science and  
244    Innovation, Government of Spain. We thank the staff of XALOC beamline at ALBA  
245    Synchrotron for their assistance with X-ray diffraction data collection. We also thank  
246    Maria Gilda Dichiará Rodríguez for her technical support throughout this work.

#### 247    **Data availability**

248    Coordinates and structure factors have been deposited in the Protein Data Bank and have  
249    been assigned the accession code 7Q5D.

#### 250    **Authorship contributions**

251    Conceptualization: JLS; Experimental procedures: JLS, EEA and ARF; Data analysis:  
252    JLS, EEA and ARF; Manuscript writing: JLS, EEA.

#### 253    **Disclosure of Conflicts of Interest**

254    The authors declare that they have no conflict of interest.

#### 255    **Figure Legends**

256    **Figure 1. The non-canonical EPCR structure.** (A) The canonical (left) and non-  
257    canonical EPCR structures are shown in grey and paleyellow colors, respectively. The  
258    residues in the  $\alpha 2$  helix with severe folding transitions are highlighted. 2Fo-Fc electron  
259    density maps are shown as blue meshes. In order to confirm the novel conformation, maps  
260    were generated using either the canonical or non-canonical coordinates of residues

261 Tyr154 through Thr157. The bound phospholipids are shown in the central cavities in  
262 stick format (B) Superposition of the canonical and non-canonical structures. Tyr154,  
263 Asn155 and Thr157 are highlighted for comparison purposes. (C) Directional switch in  
264 the  $\alpha 2$  helix of EPCR.

265 **Figure 2. Impact of the non-canonical folding mode in protein C/APC binding.** (A)  
266 Structure of the protein C Gla domain in complex with the canonical conformation of  
267 EPCR (PDB 1LQV). The contacts with the Gla domain established by EPCR Tyr154 are  
268 highlighted with grey dashed lines. Tyr154 residues in both the canonical and non-  
269 canonical EPCR structures are highlighted in sticks for comparison purposes and to better  
270 visualize the impact of the folding transition in protein C binding. (B) Upper panel,  
271 measurement of kinetic constant rates and affinity interaction between wild type EPCR  
272 and APC (upper panel). Red color traces denote buffer signal-subtracted raw binding  
273 data and black traces indicate fitting to a 1:1 binding kinetic model. Lower panel,  
274 comparison of binding signal of 125 nM APC to EPCR or EPCR<sub>Y154A</sub>. (C) Upper panel,  
275 intermolecular contacts between the non-canonical EPCR Tyr154 and N-  
276 acetylglucosamine (NAG) in a crystallographic symmetry mate EPCR molecule. Lower  
277 panel, analogous view with the canonical EPCR structure (PDB 1L8J). The 1L8J  
278 symmetry mate (palecyan color) is shown superposed with the symmetry mate of the non-  
279 canonical EPCR structure.

280



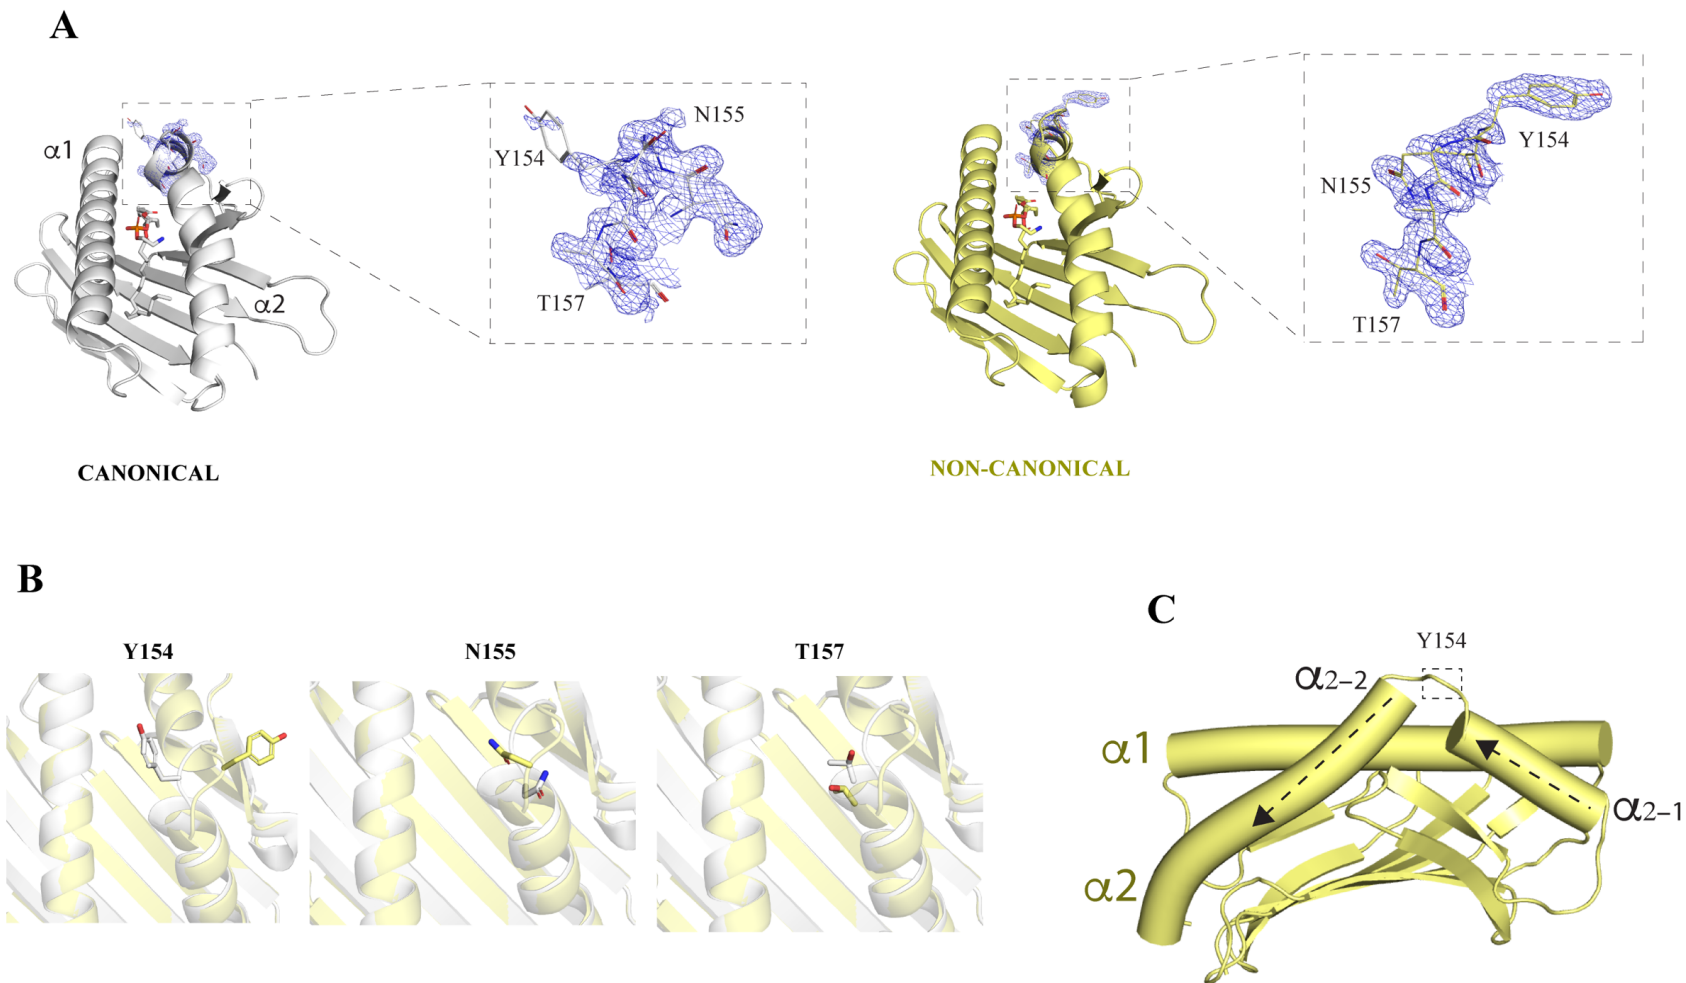

**A**

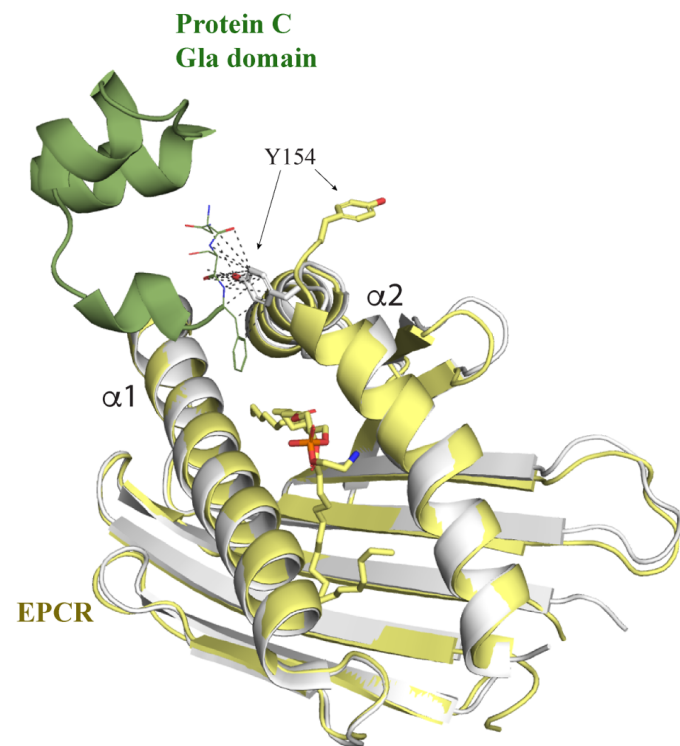

**B**

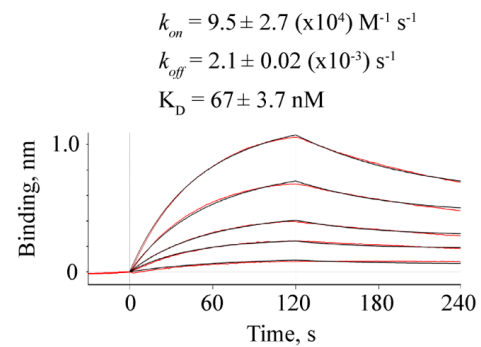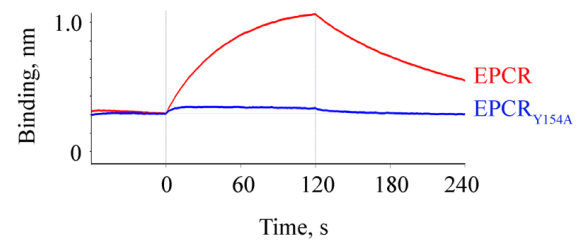

**C**

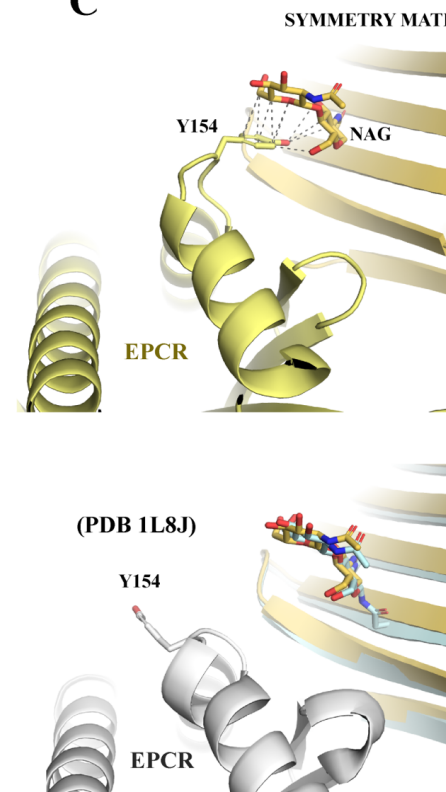

Source: https://www.biorxiv.org/content/10.1101/2021.12.16.472967v1.full.pdf
